# Supplementary material for: Unhealthy Food Bias in Food Addiction: Behavioral Evidence from a Probabilistic Image Choice Task
Source: Research Square preprint supplement (doi:10.21203/rs.3.rs-7827708/v1), 2025-12-30
Supplement: Supplementary file 1 [file 41de8b29fc2c1810e754923e.docx]

PIC_FA_Supplementary Materials

**Fig. S1. Images in the Healthy food category.** Images were selected from the food.pics database.

**Fig. S2. Images in the Unhealthy food category.** Images were selected from food.pics database.

| **Nutrient** | **Healthy** | **Unhealthy** |
| --- | --- | --- |
| Calories (kcal/100g) | 32.15 | 307.71 |
| Protein (g/100g) | 1.31 | 9.00 |
| Fat (g/100g) | 0.25 | 18.34 |
| Carbs (g/100g) | 5.33 | 26.07 |
| Fibre (g/100g) | 2.64 | 1.20 |

**Table S1: Nutritional comparison Healthy vs Unhealthy food (Averages)**

| **Attribute** | **Healthy** | **Unhealthy** |
| --- | --- | --- |
| Recognizability | 98.05 | 95.64 |
| Familiarity | 97.13 | 95.52 |
| Valence (Pleasantness) | 61.23 | 46.72 |
| Arousal (Excitement) | 32.62 | 30.39 |
| Complexity | 26.35 | 35.47 |
| Palatability (Taste Appeal) | 60.56 | 51.45 |
| Craving (Desirability) | 34.64 | 27.74 |

**Table S2: psychometric comparison Healthy vs Unhealthy food (Averages)**
